# Supplementary material
Source: HighWire-hosted journal article supplement (https://jitc.bmj.com/content/8/1/e000544)
Supplement: inline-supplementary-material-1 [file inline-supplementary-material-1.pdf]

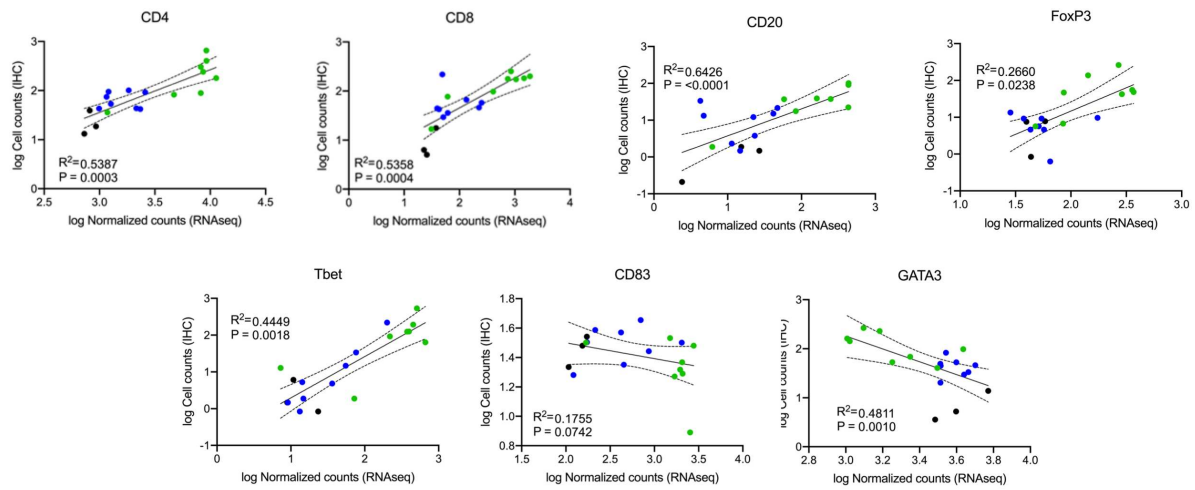

Supplemental figure 1. Linear regression plots of RNAseq log normalized counts vs IHC log cell count data from the Mel48 clinical trial VSME samples. Colors depict clinical trial arm (black: Mel48 1A/2A; blue: Mel48 1B/2B; green: Mel48 1C/2C.)
